# Supplementary material
Source: MDPI journal article supplement (https://www.mdpi.com/2071-1050/12/24/10347)
Supplement: s1 [file s1]

Supplemental Materials

**Table S1.** Test Day Least Square Means (LSM) for production, head chamber yield, gas dry matter intake with a correction factor (cDMI) yield, and intensity of methane (CH<sub>4</sub>), carbon dioxide (CO<sub>2</sub>), nitrous oxide (N<sub>2</sub>O), and ammonia (NH<sub>3</sub>) from all Holstein dairy cattle enrolled in the trial (n = 20).

|                                       | Test Day LSM       |                    |                    |                    |                    | SEM  | <i>p-values</i><br>Day |
|---------------------------------------|--------------------|--------------------|--------------------|--------------------|--------------------|------|------------------------|
|                                       | Day 0 <sup>1</sup> | Day 14             | Day 28             | Day 42             | Day 56             |      |                        |
| <b>Production</b>                     |                    |                    |                    |                    |                    |      |                        |
| CH <sub>4</sub> (g/period)            | 399                | 338 <sup>a</sup>   | 390 <sup>b</sup>   | 367 <sup>b</sup>   | 380 <sup>b</sup>   | 11.4 | <.001                  |
| CO <sub>2</sub> (g/period)            | 9800               | 8747 <sup>a</sup>  | 9990 <sup>b</sup>  | 9392 <sup>ac</sup> | 9688 <sup>c</sup>  | 267  | <.001                  |
| N <sub>2</sub> O (mg/period)          | 1705               | 1339               | 1379               | 1295               | 1332               | 43.3 | 0.32                   |
| NH <sub>3</sub> (mg/period)           | 423                | 331 <sup>a</sup>   | 358 <sup>a</sup>   | 285 <sup>b</sup>   | 274 <sup>b</sup>   | 11.7 | <.001                  |
| <b>Head Chamber Yield<sup>2</sup></b> |                    |                    |                    |                    |                    |      |                        |
| CH <sub>4</sub> (g/period/kg)         | 26.5               | 23.8               | 25.3               | 23.6               | 24.6               | 0.65 | 0.17                   |
| CO <sub>2</sub> (g/period/kg)         | 652                | 620                | 652                | 608                | 630.7              | 19.1 | 0.18                   |
| N <sub>2</sub> O (mg/period/kg)       | 113                | 94.0 <sup>a</sup>  | 89.8 <sup>ab</sup> | 83.3 <sup>b</sup>  | 86.4 <sup>ab</sup> | 2.66 | 0.012                  |
| NH <sub>3</sub> (mg/period/kg)        | 28.0               | 23.7 <sup>a</sup>  | 23.3 <sup>a</sup>  | 18.6 <sup>b</sup>  | 17.9 <sup>b</sup>  | 0.97 | <.001                  |
| <b>cDMI Yield<sup>3</sup></b>         |                    |                    |                    |                    |                    |      |                        |
| CH <sub>4</sub> (g/period/kg)         | 19.6               | 16.9 <sup>a</sup>  | 18.5 <sup>b</sup>  | 17.5 <sup>ab</sup> | 18.2 <sup>b</sup>  | 0.45 | 0.005                  |
| CO <sub>2</sub> (g/period/kg)         | 481                | 438 <sup>a</sup>   | 475 <sup>b</sup>   | 449 <sup>ab</sup>  | 467 <sup>b</sup>   | 8.80 | 0.003                  |
| N <sub>2</sub> O (mg/period/kg)       | 83.4               | 66.6               | 65.4               | 61.6               | 64.0               | 1.42 | 0.09                   |
| NH <sub>3</sub> (mg/period/kg)        | 20.7               | 16.8 <sup>a</sup>  | 16.6 <sup>a</sup>  | 13.6 <sup>b</sup>  | 13.2 <sup>b</sup>  | 0.44 | <.001                  |
| <b>Intensity<sup>4</sup></b>          |                    |                    |                    |                    |                    |      |                        |
| CH <sub>4</sub> (g/period/kg)         | 9.43               | 7.72 <sup>a</sup>  | 9.16 <sup>b</sup>  | 9.13 <sup>ab</sup> | 9.72 <sup>b</sup>  | 0.39 | <.001                  |
| CO <sub>2</sub> (g/period/kg)         | 107                | 202 <sup>a</sup>   | 236 <sup>b</sup>   | 235 <sup>b</sup>   | 249 <sup>b</sup>   | 10.3 | <.001                  |
| N <sub>2</sub> O (mg/period/kg)       | 18.5               | 30.8               | 32.5               | 32.3               | 32.9               | 1.31 | 0.36                   |
| NH <sub>3</sub> (mg/period/kg)        | 4.60               | 7.71 <sup>ab</sup> | 8.62 <sup>a</sup>  | 7.10 <sup>b</sup>  | 7.01 <sup>b</sup>  | 0.37 | <.001                  |

Within rows, means with different superscript differ ( $p < 0.05$ ). Differences between means determined by Tukey's multiple comparison test.

Period = 12-hour gas emission sampling period

<sup>1</sup>Day 0 included as covariate within the model for the four test days (when treatment was applied)

<sup>2</sup>gas production × (1/kg DMI from the sampling period while in the HC)

<sup>3</sup>gas production × (1/kg corrected DMI) according to Robinson et al. [29]

<sup>4</sup> gas production × (1/kg energy corrected milk)

**Table S2.** Test Day Least Square Means (LSM) for feed efficiency, daily dry matter intake (DMI), energy corrected milk (ECM), Milk fat, milk protein, milk urea nitrogen (MUN), and serum urea nitrogen (SUN) from all Holstein dairy cattle enrolled in the trial (n = 20).

|                              | Test Day LSM       |                   |                   |                    |                    | SEM  | <i>p-values</i> |
|------------------------------|--------------------|-------------------|-------------------|--------------------|--------------------|------|-----------------|
|                              | Day 0 <sup>1</sup> | Day 14            | Day 28            | Day 42             | Day 56             |      | Day             |
| Feed Efficiency <sup>2</sup> | <b>1.64</b>        | 1.69 <sup>a</sup> | 1.61 <sup>b</sup> | 1.56 <sup>bc</sup> | 1.54 <sup>c</sup>  | 0.03 | <.001           |
| DMI (kg)                     | <b>25.9</b>        | 26.1 <sup>a</sup> | 26.7 <sup>b</sup> | 26.4 <sup>a</sup>  | 26.0 <sup>a</sup>  | 0.24 | 0.003           |
| ECM (kg)                     | <b>42.4</b>        | 43.6 <sup>a</sup> | 42.5 <sup>a</sup> | 40.7 <sup>b</sup>  | 39.6 <sup>b</sup>  | 0.85 | <.001           |
| Milk Fat (kg)                | <b>1.71</b>        | 1.81 <sup>a</sup> | 1.71 <sup>b</sup> | 1.61 <sup>c</sup>  | 1.56 <sup>c</sup>  | 0.04 | <.001           |
| Milk Protein (kg)            | <b>1.11</b>        | 1.10 <sup>a</sup> | 1.14 <sup>b</sup> | 1.12 <sup>ab</sup> | 1.12 <sup>ab</sup> | 0.02 | 0.002           |
| MUN (mg/dL)                  | <b>10.1</b>        | 10.9 <sup>a</sup> | 9.20 <sup>b</sup> | 9.23 <sup>b</sup>  | 9.38 <sup>b</sup>  | 0.30 | <.001           |
| SUN (mg/dL) <sup>3</sup>     | <b>11.7</b>        | 12.5 <sup>a</sup> | 12.3 <sup>a</sup> | 10.9 <sup>b</sup>  | 11.9 <sup>a</sup>  | 0.36 | <.001           |

Within rows, means with different superscript differ ( $p < 0.05$ ). Differences between means determined by Tukey's multiple comparison test.

<sup>1</sup> Day 0 included as covariate within the model for the four test days (when treatment was applied)

<sup>2</sup> kg ECM/kg daily DMI

<sup>3</sup> Samples were collected following morning milking session (hour 0)
